# Supplementary material
Source: PubMed Central journal article supplement (PMC10541442)

Figure 2G: iNOS

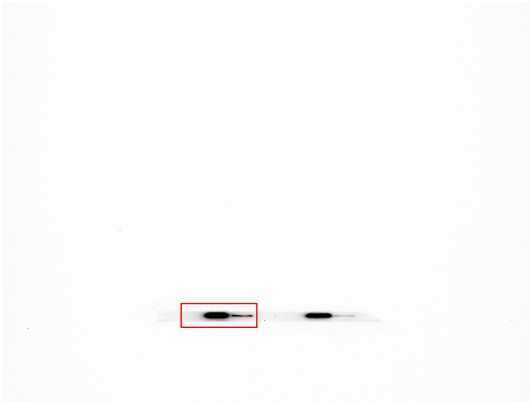

Figure 2G: COX2

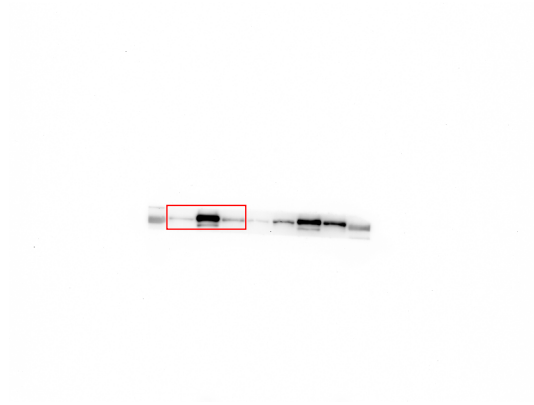

Figure 2G: HO1

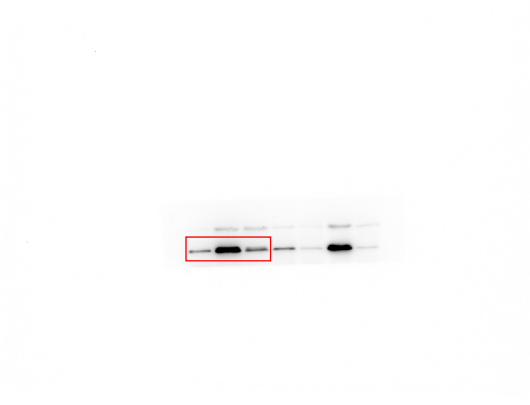

Figure 2G:  $\beta$ -actin

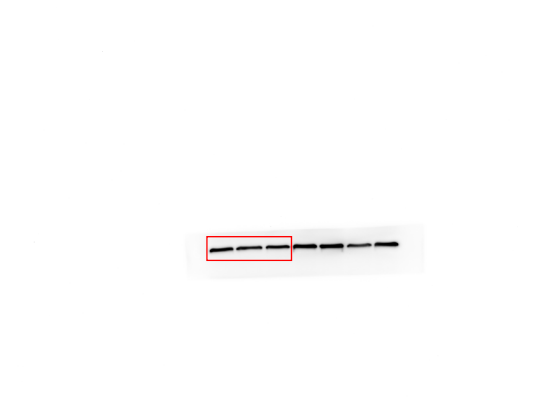

Figure 5E: HK2

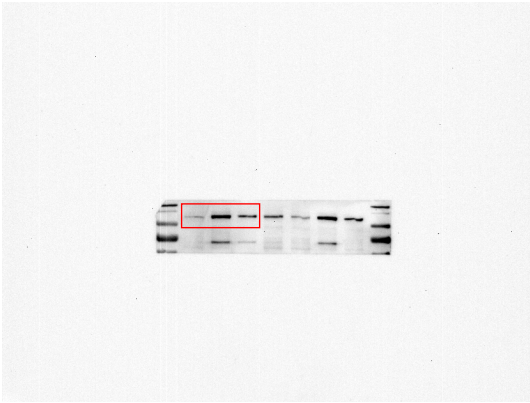

Figure 5E:  $\beta$ -actin

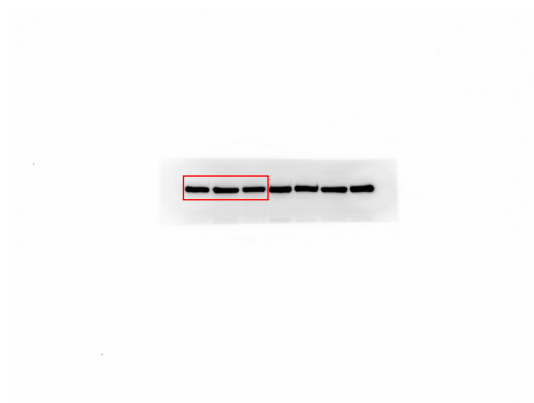

Figure 5J: HK2

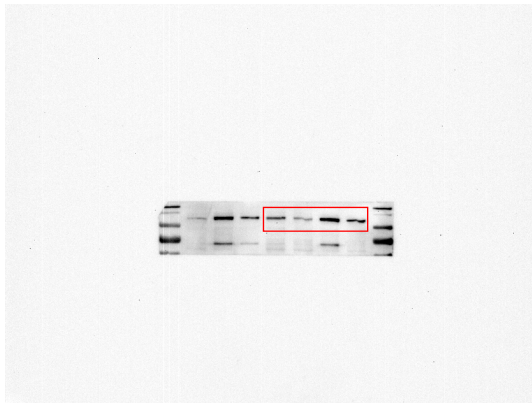

Figure 5J:  $\beta$ -actin

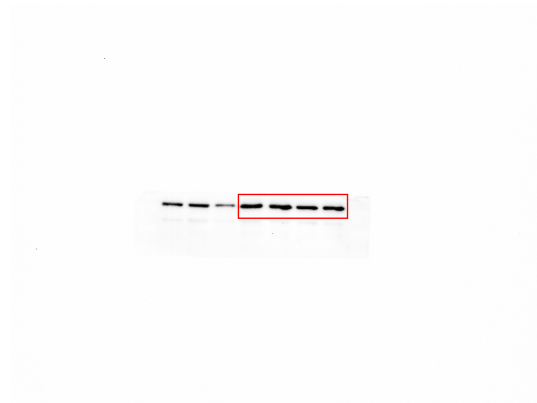

Figure 6H: iNOS

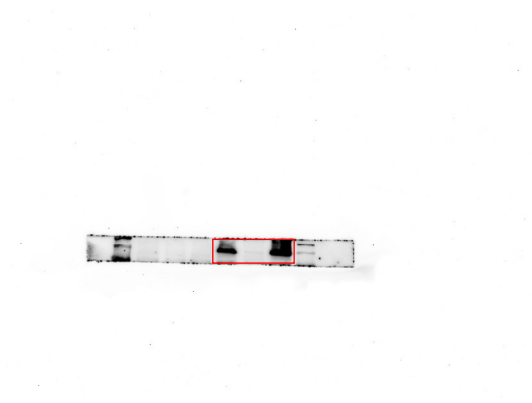

Figure 6H: COX2

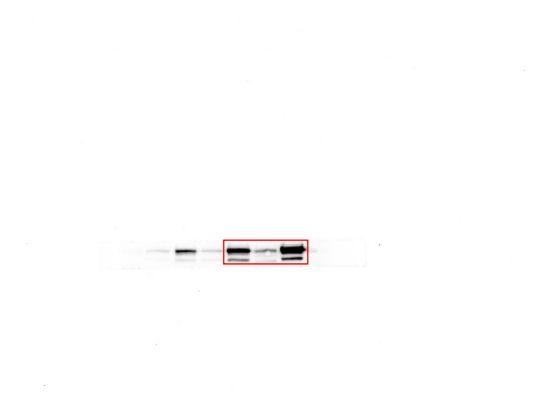

Figure 6H: HO1

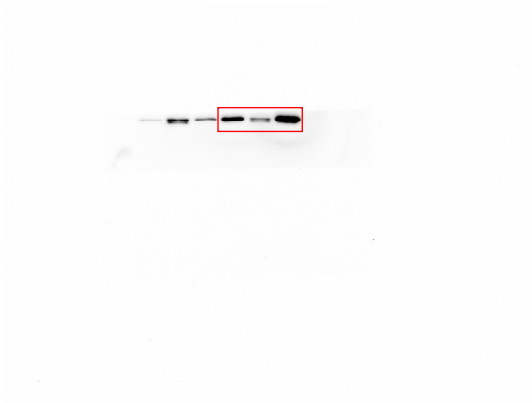

Figure 6H:  $\beta$ -actin

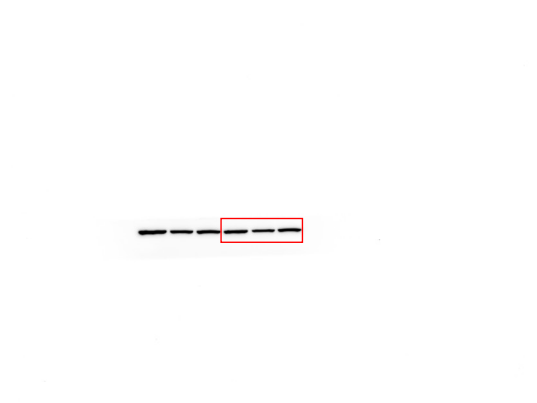

Supplementary Figure 5A: NAMPT

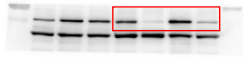

Supplementary Figure 5A:  $\beta$ -actin

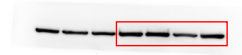

Supplementary Figure 5G: iNOS

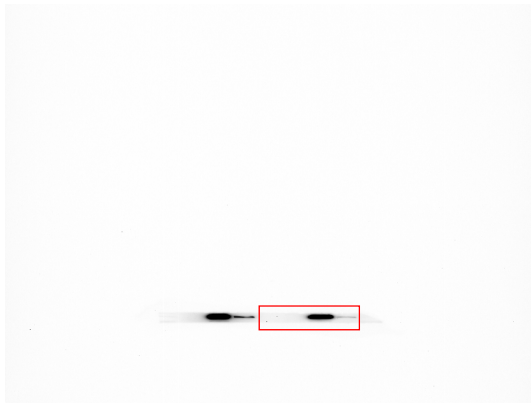

Supplementary Figure 5G: COX2

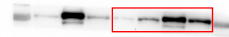

Supplementary Figure 5G: HO1

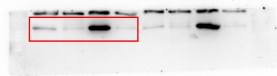

Supplementary Figure 5G:  $\beta$ -actin

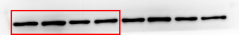

Supplement: 41423_2023_1073_MOESM2_ESM.pdf [file 41423_2023_1073_MOESM2_ESM.pdf]
